# Supplementary material for: Survey of emergency medicine doctors in London physical activity characteristics, awareness of guidelines and prescribing behaviours
Source: HighWire-hosted journal article supplement (doi:10.1136/bmjsem-2022-001495), 2023-05-01
Supplement: bmjsem-2022-001495supp001_data_supplement.pdf [file bmjsem-2022-001495supp001_data_supplement.pdf]

Supplementary Table-1

|                                         | All<br>(n=75)<br>(n(%)) | Overall<br>achieve<br>minimum<br>aerobic<br>PA<br>guidelines<br>(n=58)<br>(n(%)) | Meet<br>minimum<br>aerobic<br>PA<br>guidelines just<br>via<br>recreation (n=51)<br>(n(%)) | Meet<br>minimum<br>aerobic<br>PA guidelines just<br>at work<br>(n=14)<br>(n(%)) | Meet<br>mini-<br>mum<br>aerobic<br>PA just<br>via AT<br>(n=41)<br>(n(%)) | Aware<br>of mini-<br>mum PA<br>& SB<br>guidelines<br>(n=46)<br>(n(%)) | Meet<br>mini-<br>mum<br>MS<br>guidelines<br>(n=36)<br>(n(%)) | Aware<br>of MS<br>guidelines<br>(n=25)<br>(n(%)) | Median<br>SB per<br>day<br>(n=75)<br>(hh:mm) | Prescri-<br>-be PA<br>from<br>ED<br>(n=23)<br>(n(%)) |
|-----------------------------------------|-------------------------|----------------------------------------------------------------------------------|-------------------------------------------------------------------------------------------|---------------------------------------------------------------------------------|--------------------------------------------------------------------------|-----------------------------------------------------------------------|--------------------------------------------------------------|--------------------------------------------------|----------------------------------------------|------------------------------------------------------|
| Age<br>(years)                          |                         |                                                                                  |                                                                                           |                                                                                 |                                                                          |                                                                       |                                                              |                                                  |                                              |                                                      |
| 26-30                                   | 28<br>(37.3)            | 21 (75.0)                                                                        | 20 (71.4)                                                                                 | 4 (14.3)                                                                        | 14<br>(50.0)                                                             | 20<br>(71.4)                                                          | 13<br>(46.4)                                                 | 9 (32.1)                                         | 05:00                                        | 4 (14.3)                                             |
| 31-35                                   | 19<br>(25.3)            | 15 (78.9)                                                                        | 15 (78.9)                                                                                 | 2 (10.5)                                                                        | 9 (47.4)                                                                 | 10<br>(52.6)                                                          | 10<br>(52.6)                                                 | 7 (36.8)                                         | 03:00                                        | 7 (36.8)                                             |
| 36-40                                   | 10<br>(13.3)            | 8 (80.0)                                                                         | 5 (50.0)                                                                                  | 3 (30.0)                                                                        | 6 (60.0)                                                                 | 4 (40.0)                                                              | 4 (40.0)                                                     | 3 (30.0)                                         | 05:00                                        | 5 (50.0)                                             |
| 41-45                                   | 7 (9.3)                 | 5 (71.4)                                                                         | 4 (57.1)                                                                                  | 1 (14.3)                                                                        | 5 (71.4)                                                                 | 2 (28.6)                                                              | 4 (57.1)                                                     | 1 (14.3)                                         | 08:00                                        | 3 (42.9)                                             |
| 46-50                                   | 6 (8.0)                 | 5 (83.3)                                                                         | 3 (50.0)                                                                                  | 2 (33.3)                                                                        | 3 (50.0)                                                                 | 6<br>(100.0)                                                          | 4 (66.7)                                                     | 2 (33.3)                                         | 04:00                                        | 2 (33.3)                                             |
| 51-55                                   | 4 (5.3)                 | 3 (75.0)                                                                         | 3 (75.0)                                                                                  | 1 (25.0)                                                                        | 3 (75.0)                                                                 | 3 (75.0)                                                              | 1 (25.0)                                                     | 2 (50.0)                                         | 06:20                                        | 1 (25.0)                                             |
| 66-70                                   | 1 (1.3)                 | 1 (100.0)                                                                        | 1 (100.0)                                                                                 | 1 (100.0)                                                                       | 1<br>(100.0)                                                             | 1<br>(100.0)                                                          | 0 (0.0)                                                      | 1<br>(100.0)                                     | 04:00                                        | 1<br>(100.0)                                         |
| Gender                                  |                         |                                                                                  |                                                                                           |                                                                                 |                                                                          |                                                                       |                                                              |                                                  |                                              |                                                      |
| Male                                    | 40<br>(53.3)            | 33 (82.5)                                                                        | 31 (77.5)                                                                                 | 7 (17.5)                                                                        | 21<br>(52.5)                                                             | 23<br>(50.0)                                                          | 20<br>(55.6)                                                 | 11<br>(44.0)                                     | 04:30                                        | 11<br>(47.8)                                         |
| Female                                  | 35<br>(46.7)            | 25 (71.4)                                                                        | 20 (57.1)                                                                                 | 7 (20.0)                                                                        | 20<br>(57.1)                                                             | 23<br>(50.0)                                                          | 16<br>(44.4)                                                 | 14<br>(56.0)                                     | 05:00                                        | 12<br>(52.2)                                         |
| Ethnicity                               |                         |                                                                                  |                                                                                           |                                                                                 |                                                                          |                                                                       |                                                              |                                                  |                                              |                                                      |
| White<br>British                        | 34<br>(45.3)            | 27 (79.4)                                                                        | 25 (73.5)                                                                                 | 3 (8.8)                                                                         | 23<br>(67.6)                                                             | 24<br>(70.6)                                                          | 14<br>(41.2)                                                 | 13<br>(38.2)                                     | 03:30                                        | 11<br>(32.4)                                         |
| White<br>Irish                          | 3 (4.0)                 | 3 (100.0)                                                                        | 3 (100.0)                                                                                 | 1 (33.3)                                                                        | 2 (66.7)                                                                 | 2 (66.7)                                                              | 3<br>(100.0)                                                 | 1 (33.3)                                         | 05:00                                        | 2 (66.7)                                             |
| Any<br>other<br>White<br>backgro<br>und | 6 (8.0)                 | 5 (83.3)                                                                         | 4 (66.7)                                                                                  | 1 (16.7)                                                                        | 3 (50.0)                                                                 | 2 (33.3)                                                              | 4 (66.7)                                                     | 1 (16.7)                                         | 06:30                                        | 0 (0.0)                                              |
| Mixed<br>White<br>and<br>Asian          | 6 (8.0)                 | 5 (83.3)                                                                         | 5 (83.3)                                                                                  | 2 (33.3)                                                                        | 5 (83.3)                                                                 | 5 (83.3)                                                              | 3 (50.0)                                                     | 3 (50.0)                                         | 06:30                                        | 2 (33.3)                                             |

Supplementary Table-1

|                                         | All<br>(n=75)<br>(n(%)) | Overall<br>achieve<br>minimu<br>m<br>aerobic<br>PA<br>guidelin<br>es<br>(n=58)<br>(n(%)) | Meet<br>minimum<br>aerobic<br>PA<br>guide-<br>lines just<br>via<br>recreatio<br>n (n=51)<br>(n(%)) | Meet<br>minimum<br>aerobic<br>PA guide-<br>lines just<br>at work<br>(n=14)<br>(n(%)) | Meet<br>mini-<br>mum<br>aerobic<br>PA just<br>via AT<br>(n=41)<br>(n(%)) | Aware<br>of mini-<br>mum PA<br>& SB<br>guide-<br>lines<br>(n=46)<br>(n(%)) | Meet<br>mini-<br>mum<br>MS<br>guide-<br>lines<br>(n=36)<br>(n(%)) | Aware<br>of MS<br>guide-<br>lines<br>(n=25)<br>(n(%)) | Median<br>SB per<br>day<br>(n=75)<br>(hh:mm) | Prescri-<br>-be PA<br>from<br>ED<br>(n=23)<br>(n(%)) |
|-----------------------------------------|-------------------------|------------------------------------------------------------------------------------------|----------------------------------------------------------------------------------------------------|--------------------------------------------------------------------------------------|--------------------------------------------------------------------------|----------------------------------------------------------------------------|-------------------------------------------------------------------|-------------------------------------------------------|----------------------------------------------|------------------------------------------------------|
| Another<br>mixed<br>group               | 1 (1.3)                 | 1 (100.0)                                                                                | 1 (100.0)                                                                                          | 0 (0.0)                                                                              | 1<br>(100.0)                                                             | 0 (0.0)                                                                    | 1<br>(100.0)                                                      | 0 (0.0)                                               | 03:00                                        | 0 (0.0)                                              |
| Indian                                  | 11<br>(14.7)            | 8 (72.7)                                                                                 | 7 (63.6)                                                                                           | 2 (18.2)                                                                             | 4 (36.4)                                                                 | 7 (63.6)                                                                   | 7 (63.6)                                                          | 4 (36.4)                                              | 06:00                                        | 3 (27.3)                                             |
| Pakistan<br>i                           | 1 (1.3)                 | 0 (0.0)                                                                                  | 0 (0.0)                                                                                            | 0 (0.0)                                                                              | 0 (0.0)                                                                  | 0 (0.0)                                                                    | 0 (0.0)                                                           | 0 (0.0)                                               | 02:00                                        | 0 (0.0)                                              |
| Any<br>other<br>Asian<br>backgro<br>und | 7 (9.33)                | 5 (71.4)                                                                                 | 3 (42.9)                                                                                           | 3 (42.9)                                                                             | 0 (0.0)                                                                  | 5 (71.4)                                                                   | 2 (28.6)                                                          | 2 (28.6)                                              | 04:00                                        | 2 (28.6)                                             |
| African                                 | 3 (4.0)                 | 2 (66.7)                                                                                 | 1 (33.3)                                                                                           | 1 (33.3)                                                                             | 3<br>(100.0)                                                             | 0 (0.0)                                                                    | 1 (33.3)                                                          | 0 (0.0)                                               | 06:00                                        | 1 (33.3)                                             |
| Arab                                    | 2 (2.7)                 | 1 (50.0)                                                                                 | 1 (50.0)                                                                                           | 0 (0.0)                                                                              | 0 (0.0)                                                                  | 1 (50.0)                                                                   | 1 (50.0)                                                          | 1 (50.0)                                              | 05:30                                        | 2<br>(100.0)                                         |
| Any<br>other<br>ethnic<br>group         | 1 (1.3)                 | 1 (100.0)                                                                                | 1 (100.0)                                                                                          | 1 (100.0)                                                                            | 0 (0.0)                                                                  | 0 (0.0)                                                                    | 0 (0.0)                                                           | 0 (0.0)                                               | 06:39                                        | 0 (0.0)                                              |
| Marital<br>Status                       |                         |                                                                                          |                                                                                                    |                                                                                      |                                                                          |                                                                            |                                                                   |                                                       |                                              |                                                      |
| Single                                  | 18<br>(24.0)            | 10 (55.6)                                                                                | 9 (50.0)                                                                                           | 3 (16.7)                                                                             | 10<br>(55.5)                                                             | 9 (50.0)                                                                   | 10<br>(55.6)                                                      | 4 (22.2)                                              | 05:30                                        | 6 (33.3)                                             |
| In a<br>relations<br>hip                | 37<br>(49.3)            | 32 (86.5)                                                                                | 28 (75.7)                                                                                          | 6 (16.2)                                                                             | 20<br>(54.1)                                                             | 23<br>(62.2)                                                               | 20<br>(54.1)                                                      | 13<br>(35.1)                                          | 04:00                                        | 7 (18.9)                                             |
| Married                                 | 18<br>(24.0)            | 14 (77.8)                                                                                | 12 (66.7)                                                                                          | 4 (22.2)                                                                             | 10<br>(55.6)                                                             | 12<br>(66.7)                                                               | 10<br>(55.6)                                                      | 7 (38.9)                                              | 04:30                                        | 8 (44.4)                                             |
| Divorce<br>d                            | 1 (1.3)                 | 1 (100.0)                                                                                | 1 (100.0)                                                                                          | 1 (100.0)                                                                            | 1<br>(100.0)                                                             | 1<br>(100.0)                                                               | 1<br>(100.0)                                                      | 1<br>(100.0)                                          | 04:00                                        | 1<br>(100.0)                                         |
| Separat<br>ed                           | 1 (1.3)                 | 1 (100.0)                                                                                | 1 (100.0)                                                                                          | 0 (0.0)                                                                              | 0 (0.0)                                                                  | 1<br>(100.0)                                                               | 0 (0.0)                                                           | 0 (0.0)                                               | 07:00                                        | 1<br>(100.0)                                         |
| BMI<br>(kg/m <sup>2</sup> )             |                         |                                                                                          |                                                                                                    |                                                                                      |                                                                          |                                                                            |                                                                   |                                                       |                                              |                                                      |
| Underw<br>eight<br>(<18.5)              | 1 (1.3)                 | 1 (100.0)                                                                                | 1 (100.0)                                                                                          | 1 (100.0)                                                                            | 0 (0.0)                                                                  | 0 (0.0)                                                                    | 1<br>(100.0)                                                      | 0 (0.0)                                               | 04:00                                        | 1<br>(100.0)                                         |

Supplementary Table-1

|                                       | All<br>(n=75)<br>(n(%)) | Overall<br>achieve<br>minimu<br>m aerobic<br>PA<br>guidelin<br>es<br>(n=58)<br>(n(%)) | Meet<br>minimum<br>aerobic<br>PA<br>guide-<br>lines just<br>via<br>recreatio<br>n (n=51)<br>(n(%)) | Meet<br>minimum<br>aerobic<br>PA guide-<br>lines just<br>at work<br>(n=14)<br>(n(%)) | Meet<br>mini-<br>mum<br>aerobic<br>PA just<br>via AT<br>(n=41)<br>(n(%)) | Aware<br>of mini-<br>mum PA<br>& SB<br>guide-<br>lines<br>(n=46)<br>(n(%)) | Meet<br>mini-<br>mum<br>MS<br>guide-<br>lines<br>(n=36)<br>(n(%)) | Aware<br>of MS<br>guide-<br>lines<br>(n=25)<br>(n(%)) | Median<br>SB per<br>day<br>(n=75)<br>(hh:mm) | Prescri-<br>be PA<br>from<br>ED<br>(n=23)<br>(n(%)) |
|---------------------------------------|-------------------------|---------------------------------------------------------------------------------------|----------------------------------------------------------------------------------------------------|--------------------------------------------------------------------------------------|--------------------------------------------------------------------------|----------------------------------------------------------------------------|-------------------------------------------------------------------|-------------------------------------------------------|----------------------------------------------|-----------------------------------------------------|
| Healthy<br>weight<br>(18.5 -<br><25)  | 49<br>(65.3)            | 38 (77.6)                                                                             | 25 (71.4)                                                                                          | 8 (16.3)                                                                             | 29<br>(59.2)                                                             | 35<br>(71.4)                                                               | 24<br>(49.0)                                                      | 17<br>(34.7)                                          | 05:00                                        | 11<br>(22.4)                                        |
| Overwei<br>ght (>25<br>- <30)         | 21<br>(28.0)            | 18 (85.7)                                                                             | 14 (66.7)                                                                                          | 5 (23.8)                                                                             | 9 (42.9)                                                                 | 10<br>(47.5)                                                               | 11<br>(52.4)                                                      | 7 (33.3)                                              | 04:00                                        | 8 (38.1)                                            |
| Obese<br>(>30)                        | 4 (5.3)                 | 1 (25.0)                                                                              | 1 (25.0)                                                                                           | 0 (0.0)                                                                              | 3 (75.0)                                                                 | 1 (25.0)                                                                   | 0 (0.0)                                                           | 1 (25.0)                                              | 02:30                                        | 3 (75.0)                                            |
| Smoking<br>status                     |                         |                                                                                       |                                                                                                    |                                                                                      |                                                                          |                                                                            |                                                                   |                                                       |                                              |                                                     |
| Never                                 | 54<br>(72.0)            | 42 (77.3)                                                                             | 35 (64.8)                                                                                          | 10 (18.5)                                                                            | 30<br>(55.6)                                                             | 31<br>(57.4)                                                               | 24<br>(44.4)                                                      | 15<br>(28.8)                                          | 04:30                                        | 11<br>(20.4)                                        |
| Ex-<br>smoker                         | 13<br>(17.3)            | 12 (92.3)                                                                             | 12 (92.3)                                                                                          | 3 (23.1)                                                                             | 9 (69.2)                                                                 | 11<br>(84.6)                                                               | 8 (61.5)                                                          | 6 (46.2)                                              | 05:00                                        | 6 (46.2)                                            |
| Current<br>smoker                     | 8 (10.7)                | 4 (50.0)                                                                              | 4 (50.0)                                                                                           | 1 (12.5)                                                                             | 2 (25.0)                                                                 | 4 (50.0)                                                                   | 4 (50.0)                                                          | 4 (50.0)                                              | 04:00                                        | 6 (75.0)                                            |
| Co-<br>morbidity<br>es                |                         |                                                                                       |                                                                                                    |                                                                                      |                                                                          |                                                                            |                                                                   |                                                       |                                              |                                                     |
| 0                                     | 64<br>(85.3)            | 52 (81.3)                                                                             | 47 (73.4)                                                                                          | 9 (14.1)                                                                             | 36<br>(56.3)                                                             | 38<br>(59.4)                                                               | 33<br>(51.6)                                                      | 20<br>(31.3)                                          | 05:00                                        | 20<br>(31.3)                                        |
| 1                                     | 7 (9.3)                 | 4 (57.1)                                                                              | 4 (57.1)                                                                                           | 3 (42.9)                                                                             | 5 (71.4)                                                                 | 7<br>(100.0)                                                               | 2 (28.6)                                                          | 5 (71.4)                                              | 04:00                                        | 3 (42.9)                                            |
| 2                                     | 2 (2.7)                 | 1 (50.0)                                                                              | 0 (0.0)                                                                                            | 1 (50.0)                                                                             | 0 (0.0)                                                                  | 0 (0.0)                                                                    | 0 (0.0)                                                           | 0 (0.0)                                               | 04:30                                        | 0 (0.0)                                             |
| 3                                     | 1 (1.3)                 | 0 (0.0)                                                                               | 0 (0.0)                                                                                            | 0 (0.0)                                                                              | 0 (0.0)                                                                  | 0 (0.0)                                                                    | 0 (0.0)                                                           | 0 (0.0)                                               | 10:00                                        | 0 (0.0)                                             |
| 10                                    | 1 (1.3)                 | 1 (100.0)                                                                             | 0 (0.0)                                                                                            | 1 (100.0)                                                                            | 0 (0.0)                                                                  | 1<br>(100.0)                                                               | 1<br>(100.0)                                                      | 0 (0.0)                                               | 01:00                                        | 0 (0.0)                                             |
| Grades                                |                         |                                                                                       |                                                                                                    |                                                                                      |                                                                          |                                                                            |                                                                   |                                                       |                                              |                                                     |
| FY2                                   | 4 (5.3)                 | 3 (75.0)                                                                              | 3 (75.0)                                                                                           | 1 (25.0)                                                                             | 2 (50.0)                                                                 | 4<br>(100.0)                                                               | 2 (50.0)                                                          | 2 (50.0)                                              | 09:00                                        | 0 (0.0)                                             |
| CT1-2                                 | 7 (9.3)                 | 4 (57.1)                                                                              | 4 (57.1)                                                                                           | 0 (0.0)                                                                              | 2 (28.6)                                                                 | 5 (71.4)                                                                   | 4 (57.1)                                                          | 2 (28.6)                                              | 05:00                                        | 2 (28.6)                                            |
| Junior<br>Clinical<br>Fellow<br>(JCF) | 9 (12.0)                | 8 (88.9)                                                                              | 6 (66.7)                                                                                           | 2 (22.2)                                                                             | 4 (44.4)                                                                 | 5 (55.6)                                                                   | 4 (44.4)                                                          | 2 (22.2)                                              | 06:00                                        | 1 (11.1)                                            |

Supplementary Table-1

|                                                | All<br>(n=75)<br>(n(%)) | Overall<br>achieve<br>minimu<br>m aerobic<br>PA<br>guidelin<br>es<br>(n=58)<br>(n(%)) | Meet<br>minimum<br>aerobic<br>PA<br>guide-<br>lines just<br>via<br>recreatio<br>n (n=51)<br>(n(%)) | Meet<br>minimum<br>aerobic<br>PA guide-<br>lines just<br>at work<br>(n=14)<br>(n(%)) | Meet<br>mini-<br>mum<br>aerobic<br>PA just<br>via AT<br>(n=41)<br>(n(%)) | Aware<br>of mini-<br>mum PA<br>& SB<br>guide-<br>lines<br>(n=46)<br>(n(%)) | Meet<br>mini-<br>mum<br>MS<br>guide-<br>lines<br>(n=36)<br>(n(%)) | Aware<br>of MS<br>guide-<br>lines<br>(n=25)<br>(n(%)) | Median<br>SB per<br>day<br>(n=75)<br>(hh:mm) | Prescri-<br>-be PA<br>from<br>ED<br>(n=23)<br>(n(%)) |
|------------------------------------------------|-------------------------|---------------------------------------------------------------------------------------|----------------------------------------------------------------------------------------------------|--------------------------------------------------------------------------------------|--------------------------------------------------------------------------|----------------------------------------------------------------------------|-------------------------------------------------------------------|-------------------------------------------------------|----------------------------------------------|------------------------------------------------------|
| CT3-6                                          | 24<br>(32.0)            | 21 (87.5)                                                                             | 19 (79.2)                                                                                          | 4 (16.7)                                                                             | 14<br>(58.3)                                                             | 13<br>(54.2)                                                               | 13<br>(54.2)                                                      | 10<br>(41.7)                                          | 04:00                                        | 5 (20.8)                                             |
| Senior<br>Clinical<br>Fellow<br>(SCF)          | 8 (10.7)                | 4 (50.0)                                                                              | 3 (37.5)                                                                                           | 3 (37.5)                                                                             | 4 (50.0)                                                                 | 3 (37.5)                                                                   | 3 (37.5)                                                          | 2 (25.0)                                              | 04:30                                        | 5 (62.5)                                             |
| Trust<br>grade                                 | 6 (8.0)                 | 3 (50.0)                                                                              | 1 (16.7)                                                                                           | 2 (33.3)                                                                             | 3 (50.0)                                                                 | 4 (66.7)                                                                   | 1 (16.7)                                                          | 1 (16.7)                                              | 01:00                                        | 2 (33.3)                                             |
| Consult<br>ant                                 | 7 (9.3)                 | 7 (100.0)                                                                             | 7 (100.0)                                                                                          | 1 (14.3)                                                                             | 6 (85.7)                                                                 | 5 (71.4)                                                                   | 2 (28.6)                                                          | 2 (28.6)                                              | 04:00                                        | 3 (42.9)                                             |
| GP                                             | 8 (10.7)                | 6 (75.0)                                                                              | 6 (75.0)                                                                                           | 1 (12.5)                                                                             | 5 (62.5)                                                                 | 7 (87.5)                                                                   | 6 (75.0)                                                          | 4 (50.0)                                              | 06:00                                        | 5 (62.5)                                             |
| Other                                          | 2 (2.7)                 | 1 (50.0)                                                                              | 1 (50.0)                                                                                           | 0 (0.0)                                                                              | 1 (50.0)                                                                 | 0 (0.0)                                                                    | 1 (50.0)                                                          | 0 (0.0)                                               | 02:00                                        | 0 (0.0)                                              |
| London<br>region                               |                         |                                                                                       |                                                                                                    |                                                                                      |                                                                          |                                                                            |                                                                   |                                                       |                                              |                                                      |
| North<br>West<br>London<br>(NWL)               | 44<br>(58.7)            | 36 (81.8)                                                                             | 33 (75.0)                                                                                          | 8 (18.2)                                                                             | 30<br>(68.2)                                                             | 25<br>(56.8)                                                               | 23<br>(52.3)                                                      | 14<br>(31.8)                                          | 05:00                                        | 15<br>(34.1)                                         |
| North<br>East &<br>Central<br>London<br>(NECL) | 24<br>(32.0)            | 18 (75.0)                                                                             | 14 (58.3)                                                                                          | 6 (25.0)                                                                             | 9 (37.5)                                                                 | 15<br>(62.5)                                                               | 10<br>(41.7)                                                      | 8 (33.3)                                              | 04:00                                        | 5 (20.8)                                             |
| South<br>London<br>(SL)                        | 7 (9.3)                 | 4 ( 57.1)                                                                             | 4 (57.1)                                                                                           | 0 (0.0)                                                                              | 2 (28.6)                                                                 | 6 (85.7)                                                                   | 3 (42.9)                                                          | 3 (42.9)                                              | 06:00                                        | 3 (42.9)                                             |
| Self-<br>health<br>rating                      |                         |                                                                                       |                                                                                                    |                                                                                      |                                                                          |                                                                            |                                                                   |                                                       |                                              |                                                      |
| Excellen<br>t                                  | 28<br>(37.3)            | 24 (85.7)                                                                             | 23 (82.1)                                                                                          | 3 (10.7)                                                                             | 22<br>(78.6)                                                             | 20<br>(71.4)                                                               | 15<br>(53.6)                                                      | 11<br>(39.3)                                          | 04:00                                        | 7 (25.0)                                             |
| Very<br>good                                   | 29<br>(38.7)            | 23 (79.3)                                                                             | 20 (69.0)                                                                                          | 7 (24.1)                                                                             | 14<br>(48.3)                                                             | 19<br>(65.5)                                                               | 13<br>(44.8)                                                      | 10<br>(23.5)                                          | 05:00                                        | 8 (27.6)                                             |
| Good                                           | 15<br>(20.0)            | 9 (60.0)                                                                              | 7 (46.7)                                                                                           | 3 (20.0)                                                                             | 5 (33.3)                                                                 | 4 (26.7)                                                                   | 6 (40.0)                                                          | 3 (20.0)                                              | 04:00                                        | 6 (40.0)                                             |
| Fair                                           | 3 (4.0)                 | 2 (66.7)                                                                              | 1 (33.3)                                                                                           | 1 (33.3)                                                                             | 0 (0.0)                                                                  | 3<br>(100.0)                                                               | 2 (66.7)                                                          | 1 (33.3)                                              | 05:00                                        | 2 (66.7)                                             |
| Poor                                           | n/a                     | n/a                                                                                   | n/a                                                                                                | n/a                                                                                  | n/a                                                                      | n/a                                                                        | n/a                                                               | n/a                                                   | n/a                                          | n/a                                                  |

Supplementary Table-2

|                            | Incomplete basic demographic data (n=18) | Overall percentage of non-responders per group (%) | Incomplete GPAQ (n=16) | Overall percentage of non-responders per group (%) |
|----------------------------|------------------------------------------|----------------------------------------------------|------------------------|----------------------------------------------------|
| <b>Age (years)</b>         |                                          |                                                    |                        |                                                    |
| 26-30                      | -                                        | -                                                  | 8                      | 22.2                                               |
| 31-35                      | 5                                        | 20.8                                               | 3                      | 13.6                                               |
| 36-40                      | 1                                        | 9.1                                                | 1                      | 9.1                                                |
| 41-45                      | 1                                        | 12.5                                               | 3                      | 30.0                                               |
| 46-50                      | 1                                        | 14.3                                               | 0                      | 0.0                                                |
| 51-55                      | 1                                        | 20.0                                               | 0                      | 0.0                                                |
| 61-65                      | -                                        | -                                                  | 1                      | 100.0                                              |
| 66-70                      | 1                                        | 50.0                                               | 0                      | 0.0                                                |
| <b>Gender</b>              |                                          |                                                    |                        |                                                    |
| Male                       | 3                                        | 7.0                                                | 11                     | 21.6                                               |
| Female                     | 3                                        | 7.9                                                | 5                      | 12.5                                               |
| <b>Ethnicity</b>           |                                          |                                                    |                        |                                                    |
| White British              | 3                                        | 8.1                                                | 8                      | 19.0                                               |
| White Irish                | -                                        | -                                                  | 0                      | 0.0                                                |
| Any other White background | -                                        | -                                                  | 1                      | 14.3                                               |
| Mixed White and Asian      | -                                        | -                                                  | 0                      | 0.0                                                |
| Another mixed group        | -                                        | -                                                  | 0                      | 0.0                                                |
| Indian                     | 2                                        | 15.4                                               | 3                      | 21.4                                               |
| Pakistani                  | -                                        | -                                                  | 2                      | 66.7                                               |
| Any other Asian background | -                                        | -                                                  | 1                      | 12.5                                               |
| African                    | -                                        | -                                                  | 0                      | 0.0                                                |
| Arab                       | -                                        | -                                                  | 0                      | 0.0                                                |
| Any other ethnic group     | 1                                        | 33.3                                               | 1                      | 33.3                                               |
| <b>Marital Status</b>      |                                          |                                                    |                        |                                                    |
| Single                     | 1                                        | 5.3                                                | 2                      | 10.0                                               |
| In a relationship          | 4                                        | 9.8                                                | 8                      | 17.8                                               |
| Married                    | -                                        | -                                                  | 5                      | 21.7                                               |

Supplementary Table-2

|                               | Incomplete basic demographic data (n=18) | Overall percentage of non-responders per group (%) | Incomplete GPAQ (n=16) | Overall percentage of non-responders per group (%) |
|-------------------------------|------------------------------------------|----------------------------------------------------|------------------------|----------------------------------------------------|
| Divorced                      | 1                                        | 50.0                                               | 1                      | 50.0                                               |
| Separated                     | -                                        | -                                                  | 0                      | 0.0                                                |
| <b>BMI (kg/m<sup>2</sup>)</b> |                                          |                                                    |                        |                                                    |
| Underweight (<18.5)           | -                                        | -                                                  | 0                      | 0.0                                                |
| Healthy weight (18.5 - <25)   | -                                        | -                                                  | 8                      | 14.0                                               |
| Overweight (>25 - <30)        | -                                        | -                                                  | 3                      | 12.5                                               |
| Obese (>30)                   | 1                                        | 20.0                                               | 2                      | 33.3                                               |
| <b>Smoking status</b>         |                                          |                                                    |                        |                                                    |
| Never                         | 2                                        | 3.6                                                | 7                      | 11.5                                               |
| Ex-smoker                     | -                                        | -                                                  | 3                      | 18.8                                               |
| Current smoker                | 1                                        | 11.1                                               | 0                      | 0.0                                                |
| <b>Co-morbidities</b>         |                                          |                                                    |                        |                                                    |
| 0                             | -                                        | -                                                  | 9                      | 12.3                                               |
| 2                             | 1                                        | 33.3                                               |                        |                                                    |
| 4                             | -                                        | -                                                  | 1                      | 100.0                                              |
| <b>Grades</b>                 |                                          |                                                    |                        |                                                    |
| FY2                           | -                                        | -                                                  | 0                      | 0.0                                                |
| CT1-2                         | -                                        | -                                                  | 4                      | 36.4                                               |
| Junior Clinical Fellow (JCF)  | -                                        | -                                                  | 2                      | 18.2                                               |
| CT3-6                         | 3                                        | 11.1                                               | 6                      | 20.0                                               |
| Senior Clinical Fellow (SCF)  | -                                        | -                                                  | 2                      | 20.0                                               |
| Trust grade                   | -                                        | -                                                  | 2                      | 25.0                                               |
| Consultant                    | 2                                        | 22.2                                               | 0                      | 0.0                                                |
| GP                            | 1                                        | 11.1                                               | 0                      | 0.0                                                |
| Other                         | -                                        | -                                                  | 0                      | 0.0                                                |
| <b>London region</b>          |                                          |                                                    |                        |                                                    |
| North West London (NWL)       | 1                                        | 2.2                                                | 4                      | 8.3                                                |

Supplementary Table-2

|                                    | Incomplete basic demographic data (n=18) | Overall percentage of non-responders per group (%) | Incomplete GPAQ (n=16) | Overall percentage of non-responders per group (%) |
|------------------------------------|------------------------------------------|----------------------------------------------------|------------------------|----------------------------------------------------|
| North East & Central London (NECL) | -                                        | -                                                  | 10                     | 29.4                                               |
| South London (SL)                  | -                                        | -                                                  | 2                      | 22.2                                               |
| <b>Self-health rating</b>          |                                          |                                                    |                        |                                                    |
| Excellent                          | -                                        | -                                                  | 4                      | 12.5                                               |
| Very good                          | 1                                        | 3.3                                                | 5                      | 14.7                                               |
| Good                               | 1                                        | 6.3                                                | 0                      | 0.0                                                |
| Fair                               | -                                        | -                                                  | 0                      | 0.0                                                |
| Poor                               | -                                        | -                                                  | 1                      | 100.0                                              |

Supplementary Table-3

| Demographic (n=overall number in each demographic group) | 1: Aware of and achieve PA & MS guidelines (n=10, 7.5%) | Percentage proportion of total for each demographic (%) | 2: Achieve PA & MS guidelines and prescribe PA from ED (n=11, 14.7%) | Percentage proportion of total for each demographic (%) | 3: Aware of PA & MS guidelines and prescribe PA from ED (n=12, 16.0%) | Percentage proportion of total for each demographic (%) | 4: Aware of and achieve PA & MS guidelines and prescribe PA from ED (n=6, 8.0%) | Percentage proportion of total for each demographic (%) |
|----------------------------------------------------------|---------------------------------------------------------|---------------------------------------------------------|----------------------------------------------------------------------|---------------------------------------------------------|-----------------------------------------------------------------------|---------------------------------------------------------|---------------------------------------------------------------------------------|---------------------------------------------------------|
| Age (years)                                              |                                                         |                                                         |                                                                      |                                                         |                                                                       |                                                         |                                                                                 |                                                         |
| 26-30 (n=28)                                             | 3                                                       | 10.7                                                    | 2                                                                    | 7.1                                                     | 2                                                                     | 7.1                                                     | 1                                                                               | 3.6                                                     |
| 31-35 (n=19)                                             | 3                                                       | 15.8                                                    | 3                                                                    | 15.8                                                    | 4                                                                     | 21.1                                                    | 2                                                                               | 10.5                                                    |
| 36-40 (n=10)                                             | 2                                                       | 20.0                                                    | 3                                                                    | 30.0                                                    | 3                                                                     | 30.0                                                    | 2                                                                               | 20.0                                                    |
| 41-45 (n=7)                                              | 1                                                       | 14.3                                                    | 1                                                                    | 14.3                                                    | 1                                                                     | 14.3                                                    | 2                                                                               | 28.6                                                    |
| 46-50 (n=6)                                              | 1                                                       | 16.7                                                    | 2                                                                    | 33.3                                                    | 0                                                                     | 0.0                                                     | 1                                                                               | 16.7                                                    |
| 51-55 (n=4)                                              | 0                                                       | 0.0                                                     | 0                                                                    | 0.0                                                     | 1                                                                     | 25.0                                                    | 0                                                                               | 0.0                                                     |
| 66-70 (n=1)                                              | 0                                                       | 0.0                                                     | 0                                                                    | 0.0                                                     | 1                                                                     | 100.0                                                   | 0                                                                               | 0.0                                                     |
| Sex                                                      |                                                         |                                                         |                                                                      |                                                         |                                                                       |                                                         |                                                                                 |                                                         |
| Male (n=40)                                              | 6                                                       | 15.0                                                    | 6                                                                    | 15.0                                                    | 6                                                                     | 15.0                                                    | 4                                                                               | 10.0                                                    |
| Female (n=35)                                            | 4                                                       | 11.4                                                    | 5                                                                    | 14.3                                                    | 6                                                                     | 17.1                                                    | 2                                                                               | 5.7                                                     |
| Ethnicity                                                |                                                         |                                                         |                                                                      |                                                         |                                                                       |                                                         |                                                                                 |                                                         |
| White British (n=34)                                     | 5                                                       | 14.7                                                    | 5                                                                    | 14.7                                                    | 8                                                                     | 23.5                                                    | 4                                                                               | 11.8                                                    |
| White Irish (n=3)                                        | 1                                                       | 33.3                                                    | 2                                                                    | 66.7                                                    | 0                                                                     | 0.0                                                     | 0                                                                               | 0.0                                                     |
| Any other White background (n=6)                         | 1                                                       | 16.7                                                    | 0                                                                    | 0.0                                                     | 0                                                                     | 0.0                                                     | 0                                                                               | 0.0                                                     |
| Mixed White and Asian (n=6)                              | 1                                                       | 16.7                                                    | 0                                                                    | 0.0                                                     | 1                                                                     | 16.7                                                    | 0                                                                               | 0.0                                                     |



Supplementary Table-3

| Demographic (n=overall number in each demographic group) | 1: Aware of and achieve PA & MS guidelines (n=10, 7.5%) | Percentage proportion of total for each demographic (%) | 2: Achieve PA & MS guidelines and prescribe PA from ED (n=11, 14.7%) | Percentage proportion of total for each demographic (%) | 3: Aware of PA & MS guidelines and prescribe PA from ED (n=12, 16.0%) | Percentage proportion of total for each demographic (%) | 4: Aware of and achieve PA & MS guidelines and prescribe PA from ED (n=6, 8.0%) | Percentage proportion of total for each demographic (%) |
|----------------------------------------------------------|---------------------------------------------------------|---------------------------------------------------------|----------------------------------------------------------------------|---------------------------------------------------------|-----------------------------------------------------------------------|---------------------------------------------------------|---------------------------------------------------------------------------------|---------------------------------------------------------|
| Another mixed group (n=1)                                | 0                                                       | 0.0                                                     | 0                                                                    | 0.0                                                     | 0                                                                     | 0.0                                                     | 0                                                                               | 0.0                                                     |
| Indian (n=11)                                            | 2                                                       | 18.2                                                    | 2                                                                    | 18.2                                                    | 2                                                                     | 18.2                                                    | 2                                                                               | 18.2                                                    |
| Pakistani (n=1)                                          | 0                                                       | 0.0                                                     | 0                                                                    | 0.0                                                     | 0                                                                     | 0.0                                                     | 0                                                                               | 0.0                                                     |
| Any other Asian background (n=7)                         | 0                                                       | 0.0                                                     | 1                                                                    | 14.3                                                    | 0                                                                     | 0.0                                                     | 0                                                                               | 0.0                                                     |
| African (n=3)                                            | 0                                                       | 0.0                                                     | 0                                                                    | 0.0                                                     | 0                                                                     | 0.0                                                     | 0                                                                               | 0.0                                                     |
| Arab (n=2)                                               | 0                                                       | 0.0                                                     | 1                                                                    | 50.0                                                    | 1                                                                     | 50.0                                                    | 0                                                                               | 0.0                                                     |
| Any other ethnic group (n=1)                             | 0                                                       | 0.0                                                     | 0                                                                    | 0.0                                                     | 0                                                                     | 0.0                                                     | 0                                                                               | 0.0                                                     |
| Marital Status                                           |                                                         |                                                         |                                                                      |                                                         |                                                                       |                                                         |                                                                                 |                                                         |
| Single (n=18)                                            | 1                                                       | 5.6                                                     | 2                                                                    | 11.1                                                    | 1                                                                     | 5.6                                                     | 1                                                                               | 5.6                                                     |
| In a relationship (n=37)                                 | 6                                                       | 16.2                                                    | 4                                                                    | 10.8                                                    | 5                                                                     | 13.5                                                    | 3                                                                               | 8.1                                                     |
| Married (n=18)                                           | 3                                                       | 16.7                                                    | 4                                                                    | 22.2                                                    | 5                                                                     | 27.8                                                    | 2                                                                               | 11.1                                                    |
| Divorced (n=1)                                           | 0                                                       | 0.0                                                     | 0                                                                    | 0.0                                                     | 1                                                                     | 100.0                                                   | 0                                                                               | 0.0                                                     |
| Separated (n=1)                                          | 0                                                       | 0.0                                                     | 1                                                                    | 100.0                                                   | 0                                                                     | 0.0                                                     | 0                                                                               | 0.0                                                     |
| BMI                                                      |                                                         |                                                         |                                                                      |                                                         |                                                                       |                                                         |                                                                                 |                                                         |
| Underweight (less than 18.5) (n=1)                       | 0                                                       | 0.0                                                     | 1                                                                    | 100.0                                                   | 0                                                                     | 0.0                                                     | 0                                                                               | 0.0                                                     |

Supplementary Table-3

| Demographic (n=overall number in each demographic group) | 1: Aware of and achieve PA & MS guidelines (n=10, 7.5%) | Percentage proportion of total for each demographic (%) | 2: Achieve PA & MS guidelines and prescribe PA from ED (n=11, 14.7%) | Percentage proportion of total for each demographic (%) | 3: Aware of PA & MS guidelines and prescribe PA from ED (n=12, 16.0%) | Percentage proportion of total for each demographic (%) | 4: Aware of and achieve PA & MS guidelines and prescribe PA from ED (n=6, 8.0%) | Percentage proportion of total for each demographic (%) |
|----------------------------------------------------------|---------------------------------------------------------|---------------------------------------------------------|----------------------------------------------------------------------|---------------------------------------------------------|-----------------------------------------------------------------------|---------------------------------------------------------|---------------------------------------------------------------------------------|---------------------------------------------------------|
| Healthy weight (18.5 to less than 25) (n=49)             | 6                                                       | 24.0                                                    | 6                                                                    | 24.0                                                    | 5                                                                     | 20.0                                                    | 3                                                                               | 12.0                                                    |
| Overweight (greater than 25 to less than 30) (n=21)      | 4                                                       | 19.0                                                    | 4                                                                    | 19.0                                                    | 6                                                                     | 28.6                                                    | 3                                                                               | 14.3                                                    |
| Obese (great than 30) (=4)                               | 0                                                       | 0.0                                                     | 0                                                                    | 0.0                                                     | 1                                                                     | 25.0                                                    | 0                                                                               | 0.0                                                     |
| Smoking status                                           |                                                         |                                                         |                                                                      |                                                         |                                                                       |                                                         |                                                                                 |                                                         |
| Never (n=52)                                             | 6                                                       | 11.5                                                    | 5                                                                    | 9.6                                                     | 3                                                                     | 5.8                                                     | 2                                                                               | 3.8                                                     |
| Ex-smoker (n=13)                                         | 3                                                       | 23.1                                                    | 3                                                                    | 23.1                                                    | 6                                                                     | 46.2                                                    | 3                                                                               | 23.1                                                    |
| Current smoker (n=8)                                     | 1                                                       | 12.5                                                    | 3                                                                    | 37.5                                                    | 3                                                                     | 37.5                                                    | 1                                                                               | 12.5                                                    |
| Co-morbidities                                           |                                                         |                                                         |                                                                      |                                                         |                                                                       |                                                         |                                                                                 |                                                         |
| 0 (n=64)                                                 | 10                                                      | 15.6                                                    | 11                                                                   | 17.2                                                    | 10                                                                    | 15.6                                                    | 6                                                                               | 9.4                                                     |
| 1 (n=7)                                                  | 0                                                       | 0.0                                                     | 0                                                                    | 0.0                                                     | 2                                                                     | 28.6                                                    | 0                                                                               | 0.0                                                     |
| 2 (n=2)                                                  | 0                                                       | 0.0                                                     | 0                                                                    | 0.0                                                     | 0                                                                     | 0.0                                                     | 0                                                                               | 0.0                                                     |
| 3 (n=1)                                                  | 0                                                       | 0.0                                                     | 0                                                                    | 0.0                                                     | 0                                                                     | 0.0                                                     | 0                                                                               | 0.0                                                     |
| 10 (n=1)                                                 | 0                                                       | 0.0                                                     | 0                                                                    | 0.0                                                     | 0                                                                     | 0.0                                                     | 0                                                                               | 0.0                                                     |
| Grades                                                   |                                                         |                                                         |                                                                      |                                                         |                                                                       |                                                         |                                                                                 |                                                         |
| FY2 (n=4)                                                | 0                                                       | 0.0                                                     | 0                                                                    | 0.0                                                     | 0                                                                     | 0.0                                                     | 0                                                                               | 0.0                                                     |

Supplementary Table-3

| Demographic (n=overall number in each demographic group) | 1: Aware of and achieve PA & MS guidelines (n=10, 7.5%) | Percentage proportion of total for each demographic (%) | 2: Achieve PA & MS guidelines and prescribe PA from ED (n=11, 14.7%) | Percentage proportion of total for each demographic (%) | 3: Aware of PA & MS guidelines and prescribe PA from ED (n=12, 16.0%) | Percentage proportion of total for each demographic (%) | 4: Aware of and achieve PA & MS guidelines and prescribe PA from ED (n=6, 8.0%) | Percentage proportion of total for each demographic (%) |
|----------------------------------------------------------|---------------------------------------------------------|---------------------------------------------------------|----------------------------------------------------------------------|---------------------------------------------------------|-----------------------------------------------------------------------|---------------------------------------------------------|---------------------------------------------------------------------------------|---------------------------------------------------------|
| CT1-2 (n=7)                                              | 1                                                       | 14.3                                                    | 2                                                                    | 28.6                                                    | 1                                                                     | 14.3                                                    | 1                                                                               | 14.3                                                    |
| JCF (n=9)                                                | 1                                                       | 11.1                                                    | 0                                                                    | 0.0                                                     | 0                                                                     | 0.0                                                     | 0                                                                               | 0.0                                                     |
| CT3-6 (n=24)                                             | 4                                                       | 16.7                                                    | 3                                                                    | 12.5                                                    | 4                                                                     | 16.7                                                    | 2                                                                               | 8.3                                                     |
| SCF (n=8)                                                | 1                                                       | 12.5                                                    | 3                                                                    | 37.5                                                    | 2                                                                     | 25.0                                                    | 1                                                                               | 12.5                                                    |
| Trust grade (n=6)                                        | 0                                                       | 0.0                                                     | 0                                                                    | 0.0                                                     | 1                                                                     | 16.7                                                    | 0                                                                               | 0.0                                                     |
| Consultant (n=7)                                         | 0                                                       | 0.0                                                     | 0                                                                    | 0.0                                                     | 2                                                                     | 28.6                                                    | 0                                                                               | 0.0                                                     |
| GP (n=8)                                                 | 3                                                       | 37.5                                                    | 3                                                                    | 37.5                                                    | 2                                                                     | 25.0                                                    | 2                                                                               | 25.0                                                    |
| Other (n=2)                                              | 0                                                       | 0.0                                                     | 0                                                                    | 0.0                                                     | 0                                                                     | 0.0                                                     | 0                                                                               | 0.0                                                     |
| London region                                            |                                                         |                                                         |                                                                      |                                                         |                                                                       |                                                         |                                                                                 |                                                         |
| NWL (n=44)                                               | 6                                                       | 13.6                                                    | 7                                                                    | 15.9                                                    | 6                                                                     | 13.6                                                    | 3                                                                               | 6.8                                                     |
| NECL (n=24)                                              | 3                                                       | 12.5                                                    | 3                                                                    | 12.5                                                    | 3                                                                     | 12.5                                                    | 2                                                                               | 8.3                                                     |
| SL (n=7)                                                 | 1                                                       | 14.3                                                    | 1                                                                    | 14.3                                                    | 3                                                                     | 42.9                                                    | 1                                                                               | 14.3                                                    |
| Self-health rating                                       |                                                         |                                                         |                                                                      |                                                         |                                                                       |                                                         |                                                                                 |                                                         |
| Excellent (n=28)                                         | 4                                                       | 14.3                                                    | 3                                                                    | 10.7                                                    | 4                                                                     | 14.3                                                    | 2                                                                               | 7.1                                                     |
| Very good (n=29)                                         | 5                                                       | 17.2                                                    | 4                                                                    | 13.8                                                    | 6                                                                     | 20.7                                                    | 3                                                                               | 10.3                                                    |
| Good (n=15)                                              | 1                                                       | 6.7                                                     | 3                                                                    | 20.0                                                    | 1                                                                     | 6.7                                                     | 1                                                                               | 6.7                                                     |
| Fair (n=3)                                               | 0                                                       | 0.0                                                     | 1                                                                    | 33.3                                                    | 1                                                                     | 33.3                                                    | 0                                                                               | 0.0                                                     |
| Poor (n=0)                                               | n/a                                                     | n/a                                                     | n/a                                                                  | n/a                                                     | n/a                                                                   | n/a                                                     | n/a                                                                             | n/a                                                     |
